# Supplementary material
Source: PubMed Central journal article supplement (PMC3652936)
Supplement: supp_120819_con-gandell-1-at.pdf [file supp_120819_con-gandell-1-at.pdf]

## Appendix 1: Placebo-controlled randomized controlled trials of treatments of chronic constipation in older people

| Study                            | Agent                                     | Dose                                                                                      | N   | Age, yr, mean | Setting                                      | Duration, wk | Inclusion criteria                                                                                            | Results                                                                                                                                                                                             | Quality Score* | Sources of bias                                                                     |
|----------------------------------|-------------------------------------------|-------------------------------------------------------------------------------------------|-----|---------------|----------------------------------------------|--------------|---------------------------------------------------------------------------------------------------------------|-----------------------------------------------------------------------------------------------------------------------------------------------------------------------------------------------------|----------------|-------------------------------------------------------------------------------------|
| <b>Osmotic agents</b>            |                                           |                                                                                           |     |               |                                              |              |                                                                                                               |                                                                                                                                                                                                     |                |                                                                                     |
| Sanders (1)                      | Lactulose                                 | 20g daily                                                                                 | 55  | 86            | Long-term care                               | 12           | ≤ 3 BM per week and 1 or more of hard stools, tenesmus, griping, cramping, laxative, enema or suppository use | Stool frequency per day: 0.63 ± 0.31 stools with lactulose v. 0.58 ± 0.30 with placebo ( $p < 0.02$ ); fewer episodes of fecal impaction with lactulose than with placebo (6 v. 66) ( $p < 0.015$ ) | 3              | Randomization and blinding methods unknown                                          |
| Vanderdonckt et al. (2)          | Lactitol                                  | 20g daily                                                                                 | 46  | 84            | Long-term care                               | 4            | ≤ 3 BM per week, straining, symptoms for 6 months, not bedridden                                              | Stool frequency per week: 6 to 7 with lactitol v. 3 to 4 with placebo ( $p < 0.001$ )                                                                                                               | 3              | Randomization and blinding methods unknown; point estimate of efficacy not reported |
| Wasselius-De Casparis et al. (3) | Lactulose                                 | 15ml daily, 50% lactulose syrup                                                           | 103 |               | Not reported                                 | 3            | Regular laxative use                                                                                          | Success (defined as no additional laxative use) in 86% (47/54) taking lactulose v. 60% (30/49) taking placebo ( $p < 0.02$ )                                                                        | 2              | Loss to follow-up not reported                                                      |
| Zangaglia et al. (4)             | Polyethylene glycol                       | 7.3g twice daily                                                                          | 57  | 71            | Outpatient                                   | 8            | Parkinson disease and Rome criteria for chronic constipation                                                  | Stool frequency per week: 6.6 ± 2.7 in treatment group v. 3.7 ± 1.9 in placebo group ( $p < 0.002$ )                                                                                                | 4              |                                                                                     |
| <b>Bulk agents</b>               |                                           |                                                                                           |     |               |                                              |              |                                                                                                               |                                                                                                                                                                                                     |                |                                                                                     |
| Cheskin et al. (5)               | Psyllium                                  | 24g daily                                                                                 | 10  | 77            | Outpatient                                   | 4            | < 3 BM per week and/or incomplete evacuation and/or hard stools with excessive straining on >25% of BM        | Stool frequency per day: 1.3 with psyllium v. 0.8 with placebo ( $p < 0.1$ )                                                                                                                        | 2              | Small sample; not blinded                                                           |
| Ewerth et al. (6)                | Psyllium                                  | 12g daily                                                                                 | 10  | 68            | Not reported                                 | 8            | ≤ 2 BM per week and painful defecation; diverticula on barium enema                                           | Stool frequency per day: 0.98 with psyllium v. 1.02 with placebo (NS)                                                                                                                               | 3              | Small sample                                                                        |
| Rajala et al. (7)                | Wheat bran, lactitol in yoghurt           | 150 ml twice daily of 6.5% lactitol and 1.25% fibre mix (60% guar gum and 30% wheat bran) | 51  | 76            | Acute care, medical and surgical             | 2            | < 1 BM per day with straining or regular laxative use                                                         | Stool frequency per week: 5.9 ± 3.8 with fibre v. 4.3 ± 1.8 with placebo ( $p < 0.05$ )                                                                                                             | 2              | Not blinded; groups not balanced; mixture of laxatives                              |
| Sairanen et al. (8)              | Galacto-oligosaccharides (GOS) in yoghurt | 6g GOS - 6g prunes - 3g linseed daily                                                     | 43  | 76            | Long-term care or outpatient                 | 3            | < 5 BM per week without laxatives or straining; ambulatory                                                    | Stool frequency per week: 8.0 ± 0.6 with fibre v. 7.1 ± 0.5 with placebo ( $p = 0.011$ ); straining score 1.3 with fibre v 1.5 with placebo ( $p = 0.01$ )                                          | 3              | Very mild baseline constipation                                                     |
| Snustad et al. (9)               | Fibre, not specified, in cookies          | 10g daily                                                                                 | 80  | 77            | Geriatric evaluation and rehabilitation unit | 3            | Receiving laxatives, admitted to unit                                                                         | Difference in stool frequency not significant                                                                                                                                                       | 2              | Loss to follow-up not reported                                                      |
| Teuri et al. (10)                | GOS in yoghurt                            | 4.5g twice daily                                                                          | 18  | 80            | Long-term care                               | 2            | < 3 BM per week, regular laxative use or hard feces most of the time                                          | Stool frequency per week: 7.1 (95% CI 3 to 15) with fibre v 5.9 (95% CI 1 to 14) with placebo                                                                                                       | 3              | Test for statistical significance not reported                                      |
| Surakka et al. (11)              | GOS in yoghurt                            | 10g daily                                                                                 | 42  | 68            | Outpatient                                   | 3            | < 5 BM per week or continuous difficulties in defecation, or both                                             | Stool frequency (change in BM per 5 days) 0.5 with fibre (95% CI -0.4 to 1.4) v. -0.2 with placebo (95% CI -1.2 to 0.4) ( $p = 0.084$ );                                                            | 3              | Loss to follow-up not reported; groups not balanced                                 |

change in straining score -3.5 (95% CI -4.7 to -2.0) with fibre v. -0.1 (95% CI -2.1 to 1.7) with placebo ( $p = 0.025$ )

| <b>Stimulants</b>          |                                                           |                                                                             |     |    |                |   |                                                                                                                                                 |                                                                                                                                                                                                        |   |                                                                                                                        |
|----------------------------|-----------------------------------------------------------|-----------------------------------------------------------------------------|-----|----|----------------|---|-------------------------------------------------------------------------------------------------------------------------------------------------|--------------------------------------------------------------------------------------------------------------------------------------------------------------------------------------------------------|---|------------------------------------------------------------------------------------------------------------------------|
| Bub et al. (12)            | Sennosides                                                | 20g sennosides A and B in 1 cup of Smooth Move tea daily                    | 92  |    | Long-term care | 4 | Laxative use $\geq 1$ per week                                                                                                                  | 4.14 more BM with stimulant than with placebo ( $p = 0.017$ )                                                                                                                                          | 4 | Groups compared with their own run-in phase; laxatives used before study were continued during study period            |
| Huang et al. (13)          | CCH1 Chinese herbal formulation and magnesium oxide (MgO) | 1.5g to 4.5g CCH1 powder daily; MgO titrated up to 750mg daily concurrently | 90  | 73 | Long-term care | 8 | $< 3$ BM per week or MgO $\geq 750$ mg daily or bisacodyl $\geq 5$ mg daily or 2 classes of laxatives or enema or suppository $\geq 1$ per week | Stool frequency per week: $5.6 \pm 2.0$ with stimulant v. $4.6 \pm 2.5$ with placebo ( $p = 0.049$ )                                                                                                   | 3 | Randomization and blinding methods unknown; mixture of laxatives                                                       |
| <b>Stool softeners</b>     |                                                           |                                                                             |     |    |                |   |                                                                                                                                                 |                                                                                                                                                                                                        |   |                                                                                                                        |
| Hyland et al. (14)         | Diocetyl sodium sulfosuccinate                            | 100mg 3 times daily                                                         | 40  |    | Acute care     | 4 | Chronic constipation not defined                                                                                                                | Mean difference $1.0 \pm 0.29$ more stools per week with active treatment than with placebo ( $p < 0.01$ ); 12/15 patients were less constipated with active treatment than when they received placebo | 3 | Randomization and blinding methods not reported; nonconstipated participants given placebo were excluded from analysis |
| <b>Prokinetic agents</b>   |                                                           |                                                                             |     |    |                |   |                                                                                                                                                 |                                                                                                                                                                                                        |   |                                                                                                                        |
| Muller-Lissner et al. (15) | Prucalopride                                              | 1, 2 or 4mg once daily                                                      | 300 | 76 | Outpatient     | 4 | $\leq 2$ BM per week, and 1 or more of straining, hard stool or incomplete emptying on at least 25% of motions                                  | At week 1, 48.7% of patients receiving 4-mg dose had $\geq 3$ BM per week with prucalopride v. 26.1% with placebo ( $p < 0.05$ )                                                                       | 5 | Multiple statistical tests, with only 1 time point reaching significance                                               |
| <b>Biofeedback</b>         |                                                           |                                                                             |     |    |                |   |                                                                                                                                                 |                                                                                                                                                                                                        |   |                                                                                                                        |
| Simón et al. (16)          | Electromyographic biofeedback                             | 8 sessions                                                                  | 30  | 74 | Outpatient     | 4 | Rome criteria for chronic constipation                                                                                                          | Stool frequency per week: F value 187.97 in biofeedback group v. 175.49 in educational control group ( $p < 0.01$ )                                                                                    | 3 | Not blinded; small sample                                                                                              |

Note: BM = bowel movement, CI = confidence interval, NS = not significant.

\*Quality score based on Jadad scale.(17)

‡Stool frequency.

§Straining.

## References

1. Sanders JF. Lactulose syrup assessed in a double-blind study of elderly constipated patients. *J Am Geriatr Soc* 1978;26:236-9.
2. Vanderdonck J, Coulon J, Denys W, et al. Study of the laxative effect of lactitol (Importal) in an elderly institutionalized, but not bedridden, population suffering from chronic constipation. *J Clinical and Exp Gerontol* 1990;21:171-89.
3. Wesselius-De Casparis A, Braadbaart S, Bergh-Bohlken GE, et al. Treatment of chronic constipation with lactulose syrup: results of a double-blind study. *Gut* 1968;9:84-6.
4. Zangaglia R, Martignoni E, Glorioso M, et al. Macrogol for the treatment of constipation in Parkinson's disease. A randomized placebo-controlled study. *Mov Disord* 2007;22:1239-44.
5. Cheskin LJ, Kamal N, Crowell MD, et al. Mechanisms of constipation in older persons and effects of fiber compared with placebo. *J Am Geriatr Soc* 1995;43:666-9.
6. Ewerth S, Ahlberg J, Holmstrom B, et al. Influence on symptoms and transit-time of Vi-SiblinR in diverticular disease. *Acta Chir Scand Suppl* 1980;500:49-50.
7. Rajala SA, Salminen SJ, Seppanen JH, et al. Treatment of chronic constipation with lactitol sweetened yoghurt supplemented with guar gum and wheat bran in elderly hospital in-patients. *Compr Gerontol [A]* 1988;2:83-6.
8. Sairanen U, Piirainen L, Nevala R, et al. Yoghurt containing galacto-oligosaccharides, prunes and linseed reduces the severity of mild constipation in elderly subjects. *Eur J Clin Nutr* 2007;61:1423-8.
9. Snustad D, Lee V, Abraham I, et al. Dietary fiber in hospitalized geriatric patients: Too soft a solution for too hard a problem? *J Nutr Elder* 1991;10:49-63.
10. Teuri U, Korpela R. Galacto-oligosaccharides relieve constipation in elderly people. *Ann Nutr Metab* 1998;42:319-27.
11. Surakka A, Kajander K, Rajilic-Stojanovic M. Yoghurt containing galactooligosaccharides facilitates defecation among elderly subjects and selectively increases the number of bifidobacteria. *Int J Probiotics Prebiotics* 2009;4:65-74.
12. Bub S, Brinckmann J, Cicconetti G, et al. Efficacy of an herbal dietary supplement (Smooth Move) in the management of constipation in nursing home residents: a randomized, double-blind, placebo-controlled study. *J Am Med Dir Assoc* 2006;7:556-61.
13. Huang C, Su Y, Li T, et al. Treatment of constipation in long-term care with Chinese herbal formula: a randomized, double-blind placebo-controlled trial. *J Altern Complement Med* 2011;17:639-46.
14. Hyland CM, Foran JD. Dioctyl sodium sulphosuccinate as a laxative in the elderly. *Practitioner* 1968;200:698-9.
15. Müller-Lissner S, Rykx A, Kerstens R, et al. A double-blind, placebo-controlled study of prucalopride in elderly patients with chronic constipation. *Neurogastroenterol Motil* 2010;22:991-8.
16. Simón MA, Bueno AM. Behavioural treatment of the dyssynergic defecation in chronically constipated elderly patients: a randomized controlled trial. *Appl Psychophysiol Biofeedback* 2009;34:273-7.
17. Jadad AR, Moore RA, Carroll D, et al. Assessing the quality of reports of randomized clinical trials: is blinding necessary? *Control Clin Trials* 1996;17:1-12.
